# Supplementary material for: Diabetes is accompanied by secretion of pro-atherosclerotic exosomes from vascular smooth muscle cells
Source: PubMed Central journal article supplement (PMC10183121; doi:10.1186/s12933-023-01833-4), 2023-05-13
Supplement: 12933_2023_1833_MOESM1_ESM.pdf [file 12933_2023_1833_MOESM1_ESM.pdf]

**Additional file 1: Material**

for

**Diabetes is accompanied by secretion of pro-atherosclerotic exosomes from vascular  
smooth muscle cells by**

Heng Yu<sup>a</sup>, Hunter F. Douglas<sup>b</sup>, Donald Wathieu<sup>b</sup>, Ryan A. Braun<sup>b</sup>, Christine Edomwande<sup>b</sup>,  
Daniel J. Lightell, Jr.<sup>b</sup>, Thaidan Pham<sup>b</sup>, Natasha C. Klingenberg<sup>b</sup>, Shelia Pugh Bishop<sup>b</sup>, Damir B.  
Khismatullin<sup>a</sup>, and T. Cooper Woods<sup>b\*</sup>

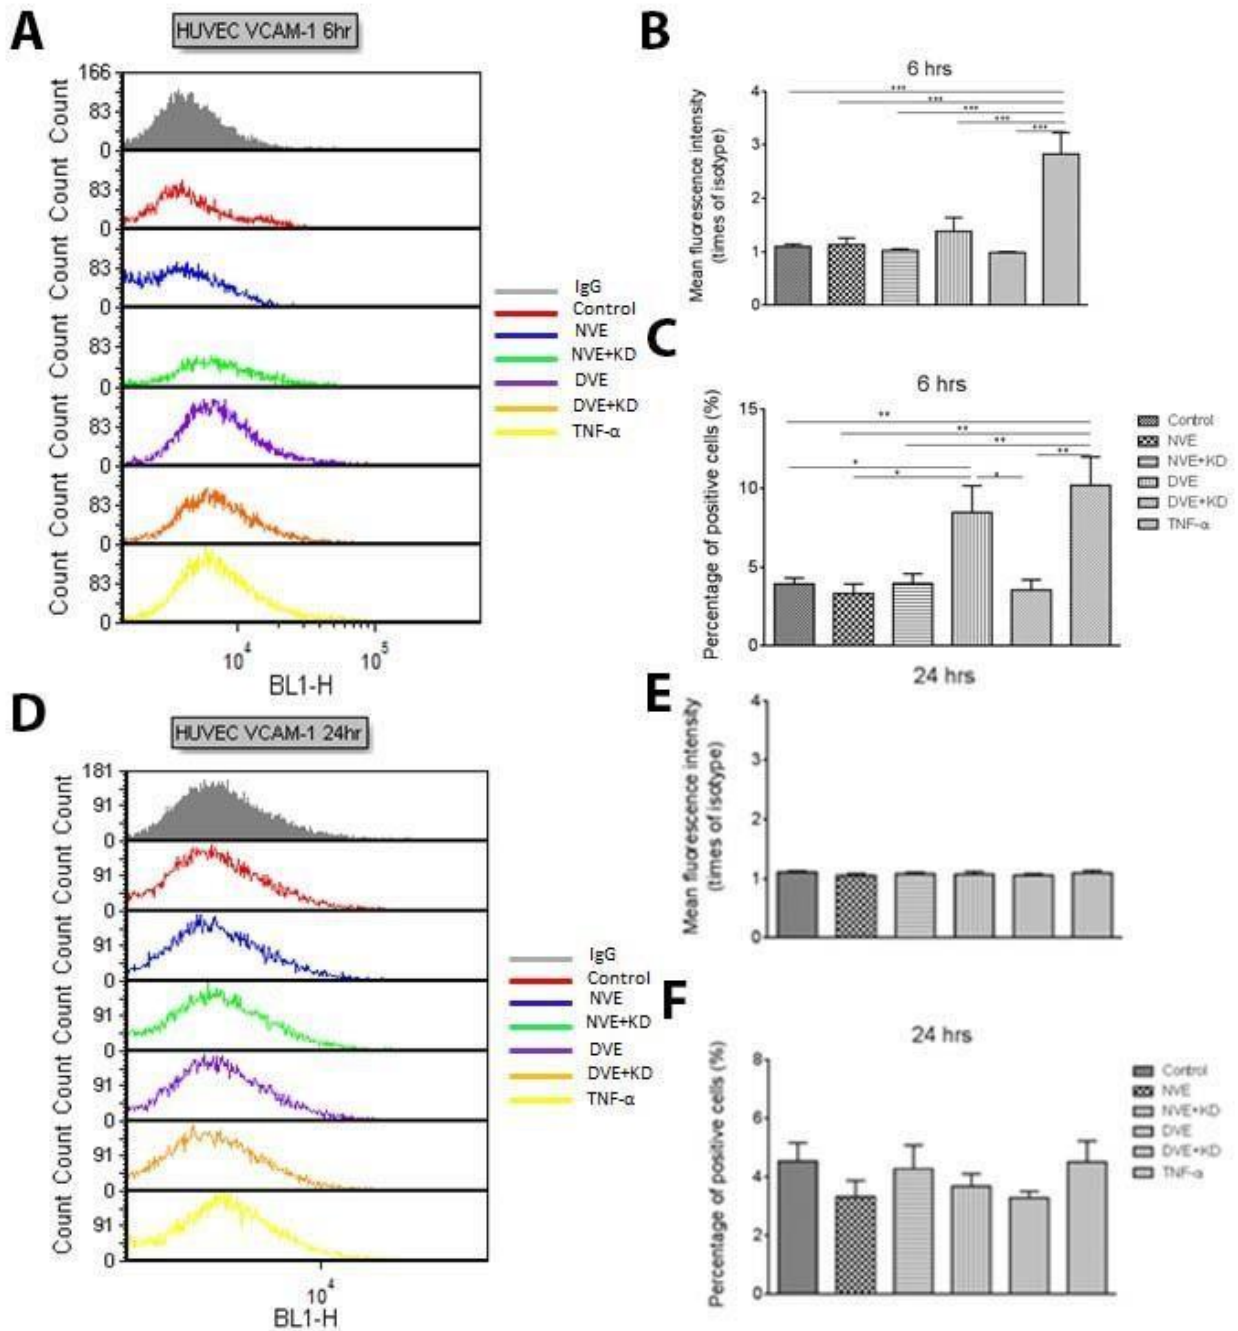

**Figure S1** – Exposure of HUVECs to DVEs promotes increased surface expression of VCAM-1. *A*: Histograms of cell surface expression of VCAM-1 expression following 6 hours of treatment. *B*: Fluorescence intensity of VCAM-1 antibody relative to the isotype control (mean  $\pm$  SEM, n = 3). *C*: Percentage of HUVECs with positive expression of VCAM-1 (mean  $\pm$  SEM, n = 3). *D*: Histograms of cell surface expression of VCAM-1 expression following 24 hours of treatment. *E*: Fluorescence intensity of VCAM-1 antibody relative to the isotype control following 24 hours of treatment (mean  $\pm$  SEM, n = 3). *F*: Percentage of HUVECs with positive expression of VCAM-1 following 24 hours of treatment (mean  $\pm$  SEM, n = 3). \* p < 0.05, \*\* p < 0.01, \*\*\* p < 0.001.
